# Supplementary material for: Primary Succession Changes the Composition and Functioning of the Protist Community on Mine Tailings, Especially Phototrophic Protists
Source: PubMed Central journal article supplement — ACS Environ Au. 2022 Jun 29;2(5):396–408. doi: 10.1021/acsenvironau.1c00066 (PMC10125303; doi:10.1021/acsenvironau.1c00066), 2022-06-29
Supplement: vg1c00066_si_001.pdf [file vg1c00066_si_001.pdf]

1 *Supporting Information*

2 **Primary succession changes composition and functioning of the protist community on**  
3 **mine tailings, especially phototrophic protists**

4 Yongbin Li<sup>1</sup>, Pin Gao<sup>1</sup>, Xiaoxu Sun<sup>1</sup>, Baoqin Li<sup>1</sup>, Lifang Guo<sup>1</sup>, Rui Yang<sup>1</sup>, Xianfa Su<sup>2</sup>, Wenlong Gao<sup>1</sup>, Zhimin  
5 Xu<sup>3</sup>, Geng Yan<sup>1</sup>, Qi Wang<sup>1</sup>, Weimin Sun<sup>1,2\*</sup>

6 <sup>1</sup> National-Regional Joint Engineering Research Center for Soil Pollution Control and Remediation in South  
7 China, Guangdong Key Laboratory of Integrated Agro-environmental Pollution Control and Management,  
8 Institute of Eco-environmental and Soil Sciences, Guangdong Academy of Sciences, Guangzhou 510650, China

9 <sup>2</sup> School of Environment, Key Laboratory of Yellow River and Huai River Water Environment and Pollution  
10 Control, Ministry of Education, Henan Normal University, Xinxiang, 453007, P. R. China

11 <sup>3</sup> Engineering and Technology Research Center for Agricultural Land Pollution Prevention and Control of  
12 Guangdong Higher Education Institutes, College of Resources and Environment, Zhongkai University of  
13 Agriculture and Engineering, Guangzhou, 510225, China

14 \*Corresponding author:

15 Dr. Weimin Sun

16 Phone: 86-020-87024633

17 Fax: 86-020-87024123

18 Email: wmsun@soil.gd.cn

19 808 Tianyuan Road, Guangzhou, Guangdong, China

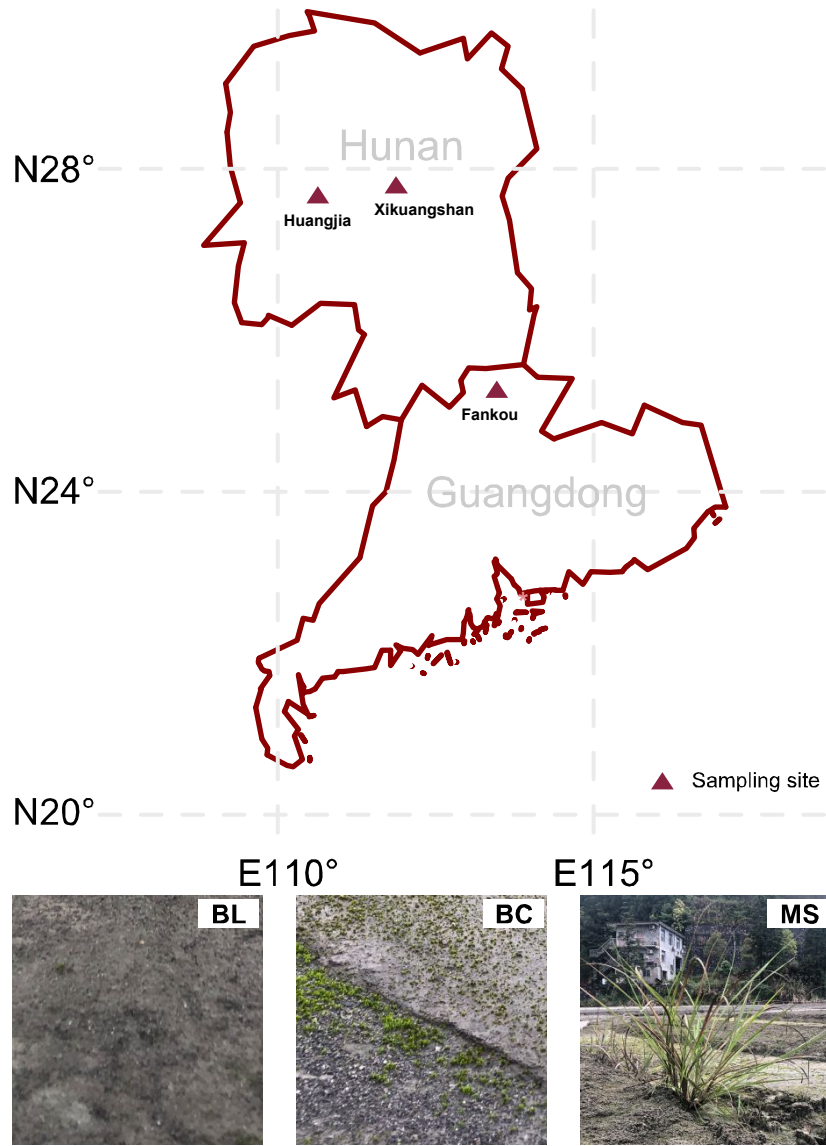

20

21 Figure S1: Sampling locations for tailings in southern China. BL: original tailings from bare land, BC: tailings  
 22 of biological crusts, MS: tailings from the *Miscanthus sinensis* rhizosphere.

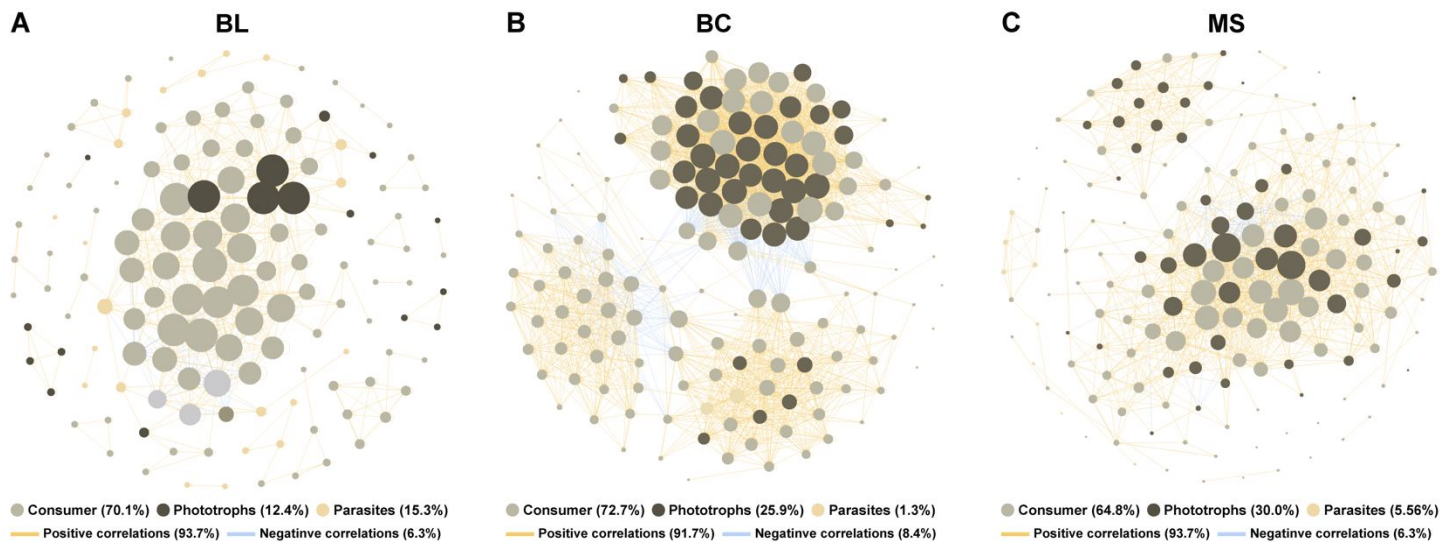

23

24

25

26

27

28

Figure S2: Co-occurrence network analysis of protist-protist showing the biological interactions in the BL (A), BC (B), and MS (C). Edges are shown only strong (Spearman correlation > |0.6|) and significant ( $p < 0.05$ ) connections. Size of the nodes is proportional to the number of connections to it. The thickness of the edges is proportional to the strongness of the correlation. BL: original tailing from bare land, BC: tailing of biological crusts, MS: tailing from the *Miscanthus sinensis* rhizosphere.

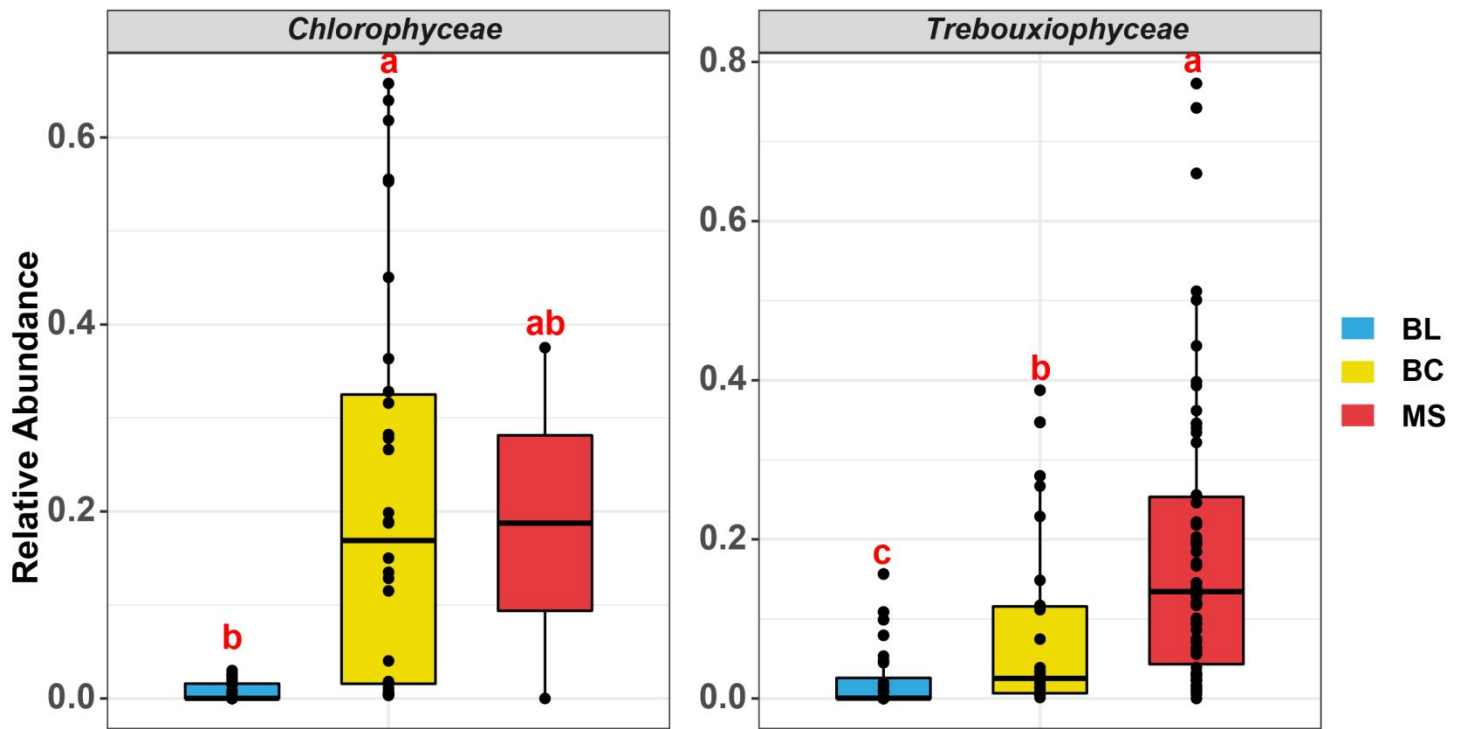

29

30

31

32

33

Figure S3: Box plots summarizing the relative abundance of keystone taxa of phototrophs at the class level. The bearing different letters (a, b, c) are significantly different from each other according to the least significant difference (LSD) test ( $p < 0.05$ ). BL: original tailing from bare land, BC: tailing of biological crusts, MS: tailing from the *Miscanthus sinensis* rhizosphere.

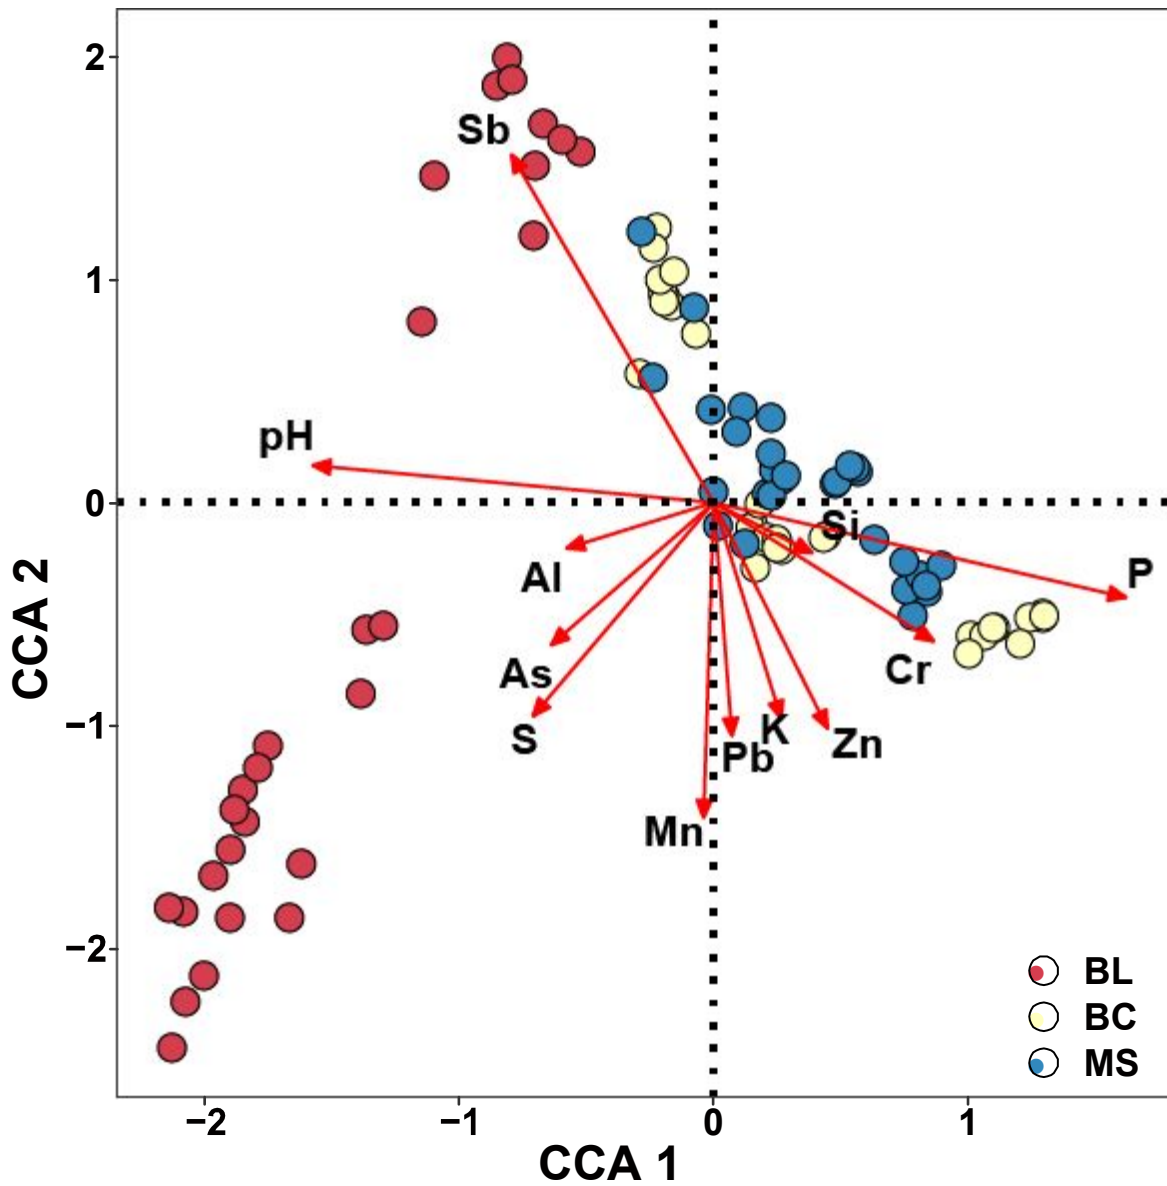

34

35 Figure S4: Redundancy analysis (RDA) demonstrating the impact of geochemical parameters on the functional  
 36 community. BL: original tailings from bare land, BC: tailings of biological crusts, MS: tailings from the  
 37 *Miscanthus sinensis* rhizosphere.
